# Supplementary figures and images for: Temporal Dissection of Altered Pathways during the Evolution of Cancer
Source: Preprints.org preprint supplement (doi:10.20944/preprints202210.0470.v1), 2022-10-31

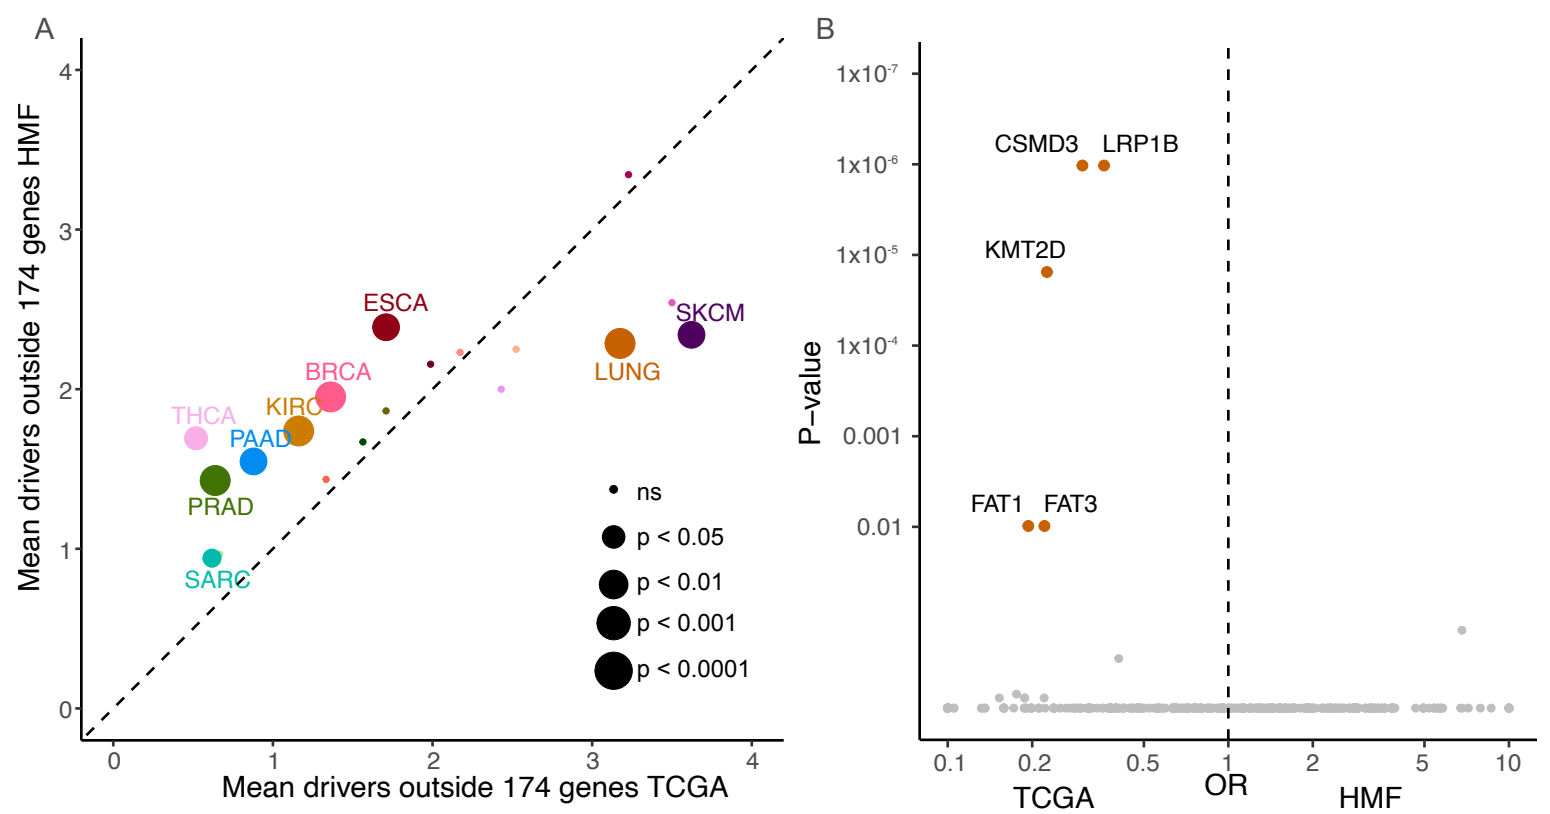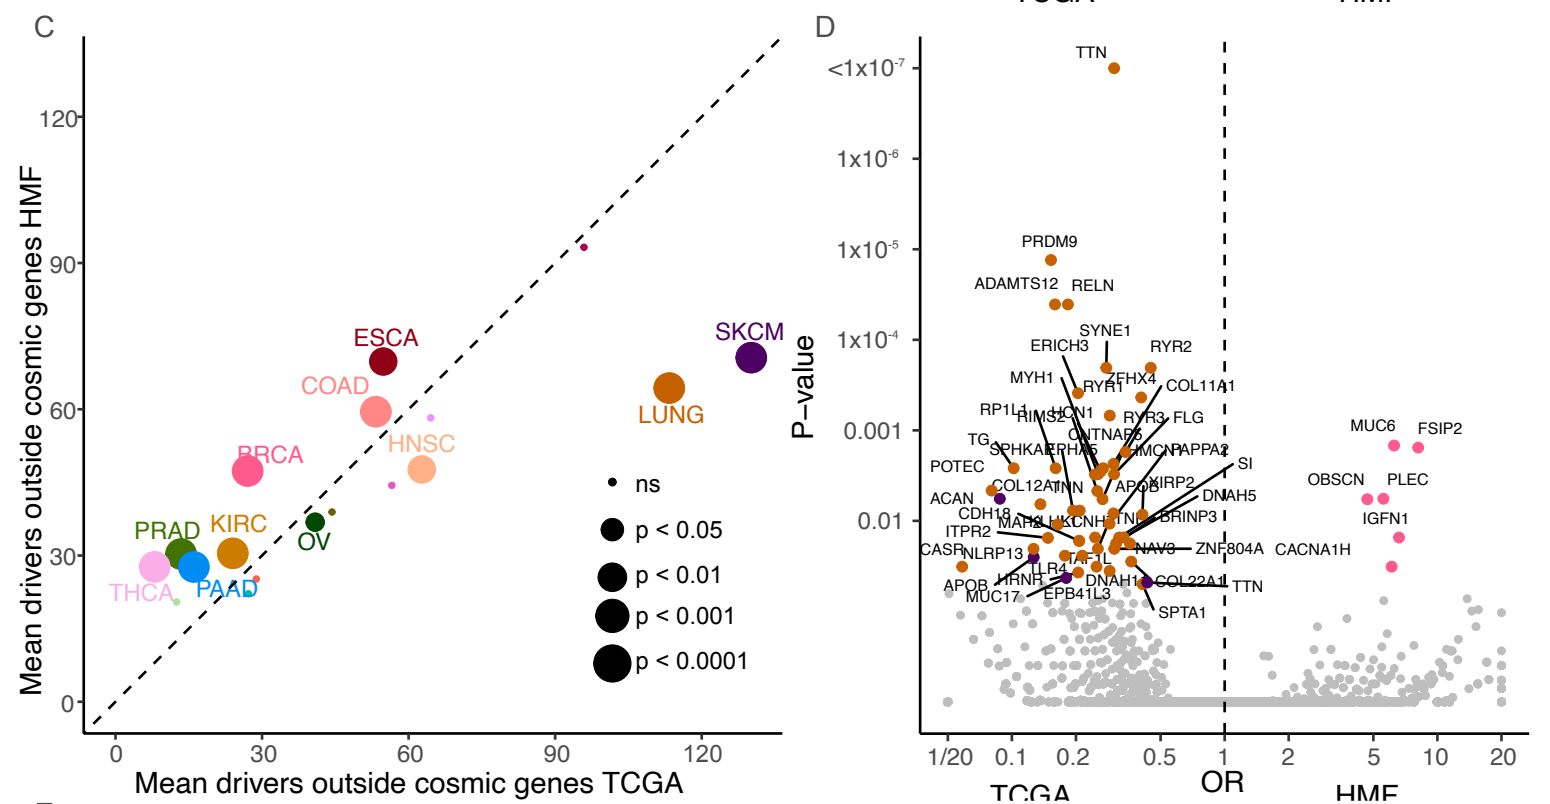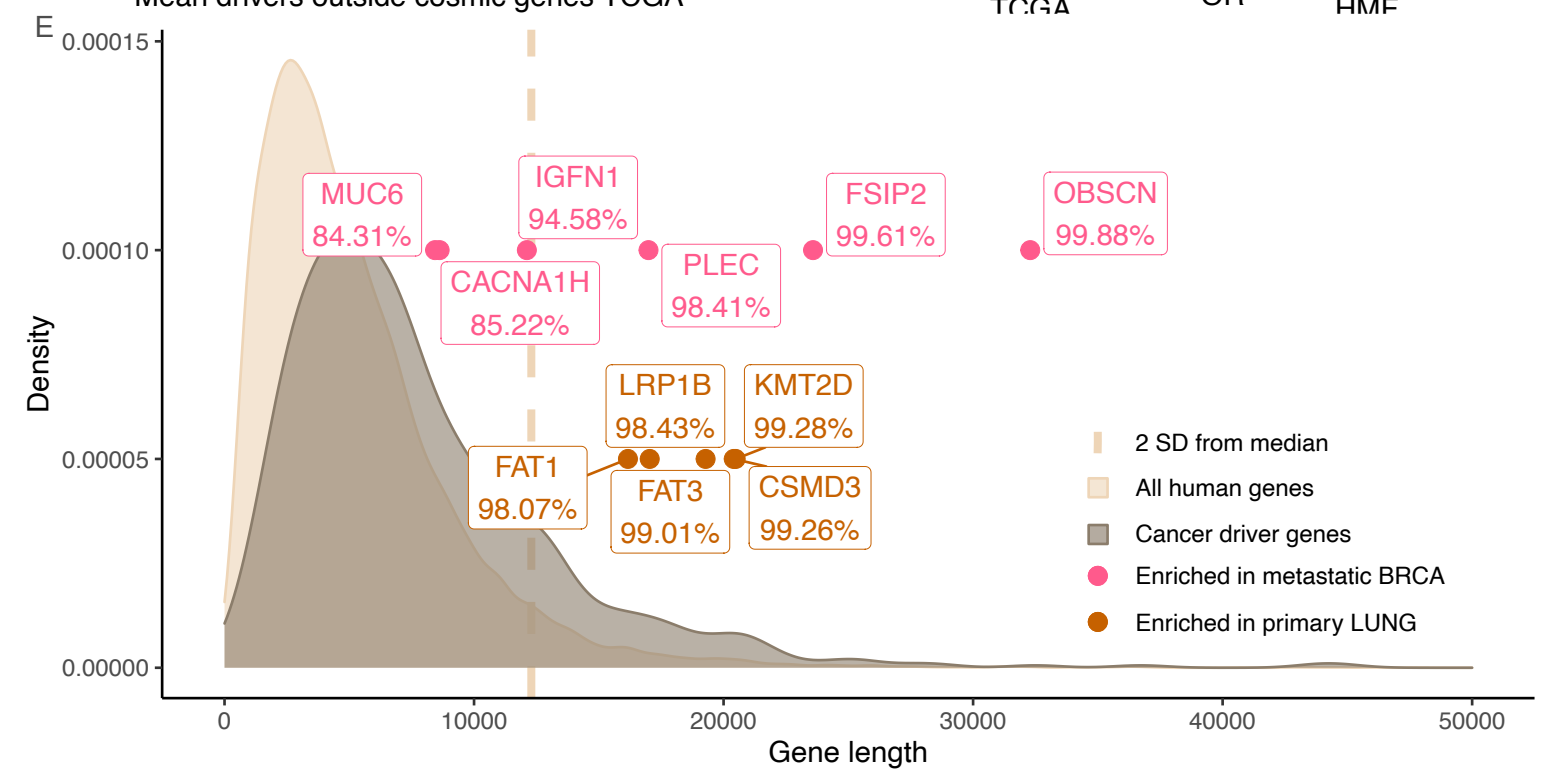

BLCA COAD HNSC LUNG PRAD SKCM UCEC  
 BRCA ESCA KIRC MESO PAAD STAD  
 CESC GBM LIHC OV SARC THCA

Supplement: Supplementary file 2 [file supplementary]

**A**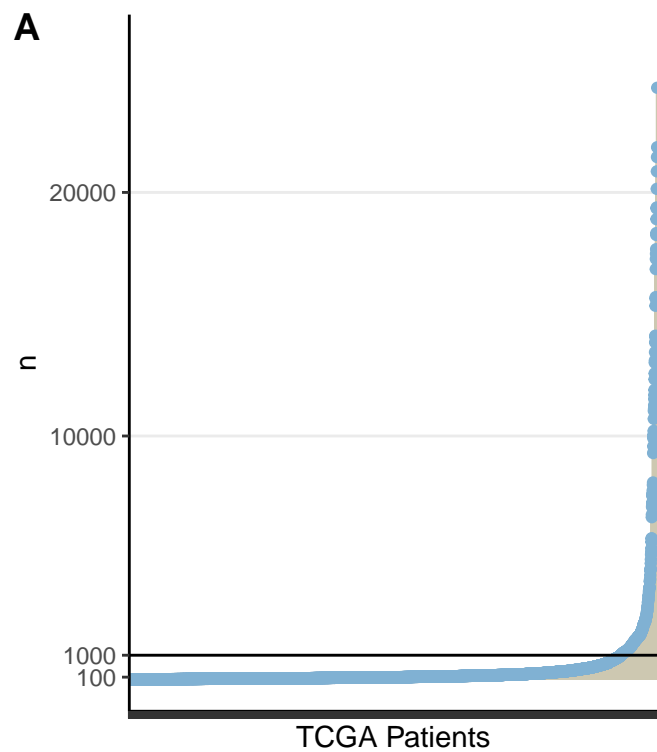**B**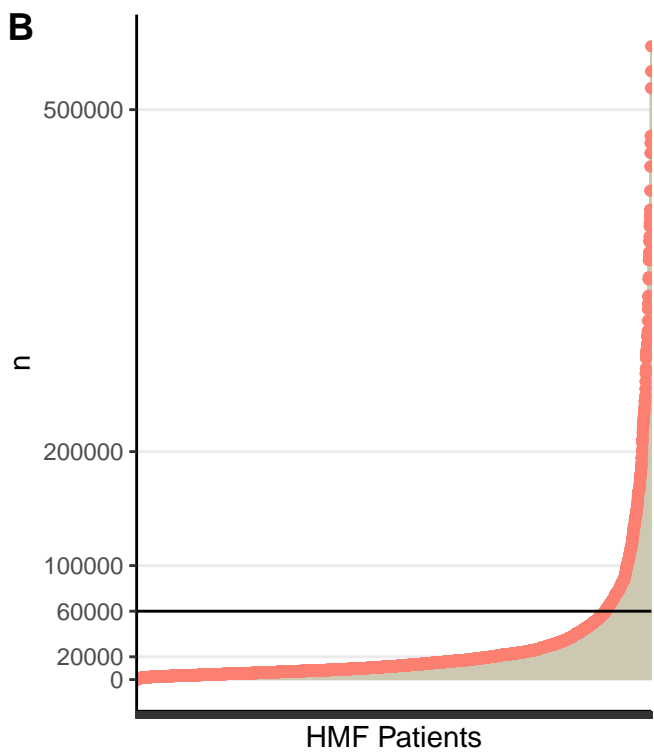

Supplement: Supplementary file 3 [file supplementary]

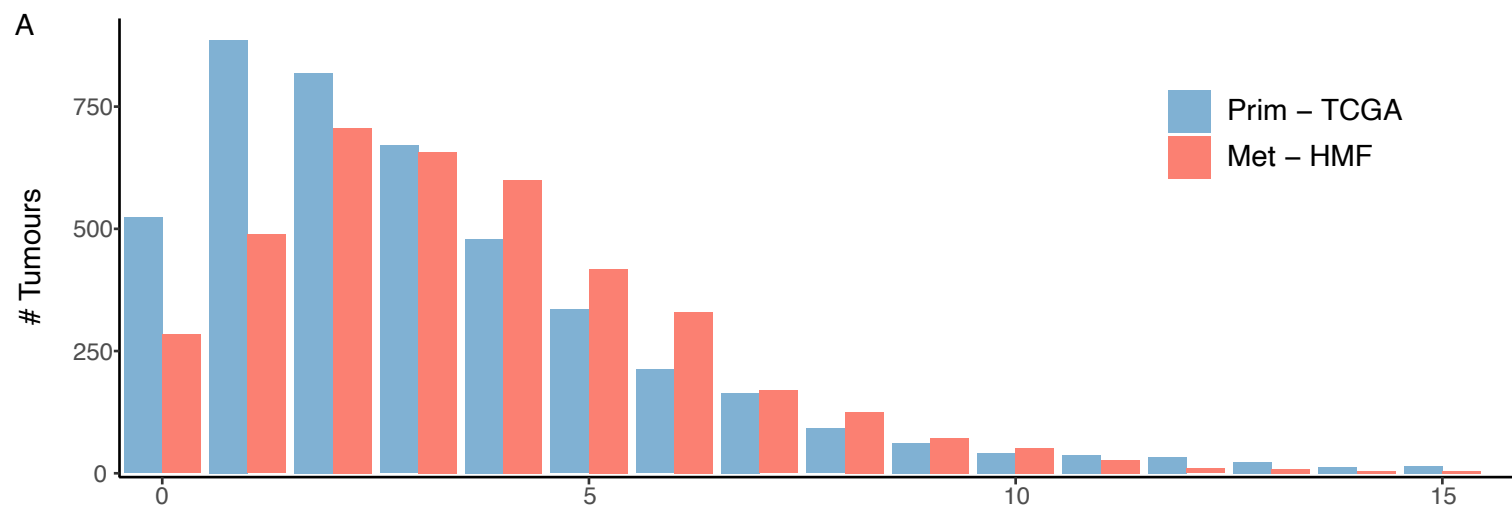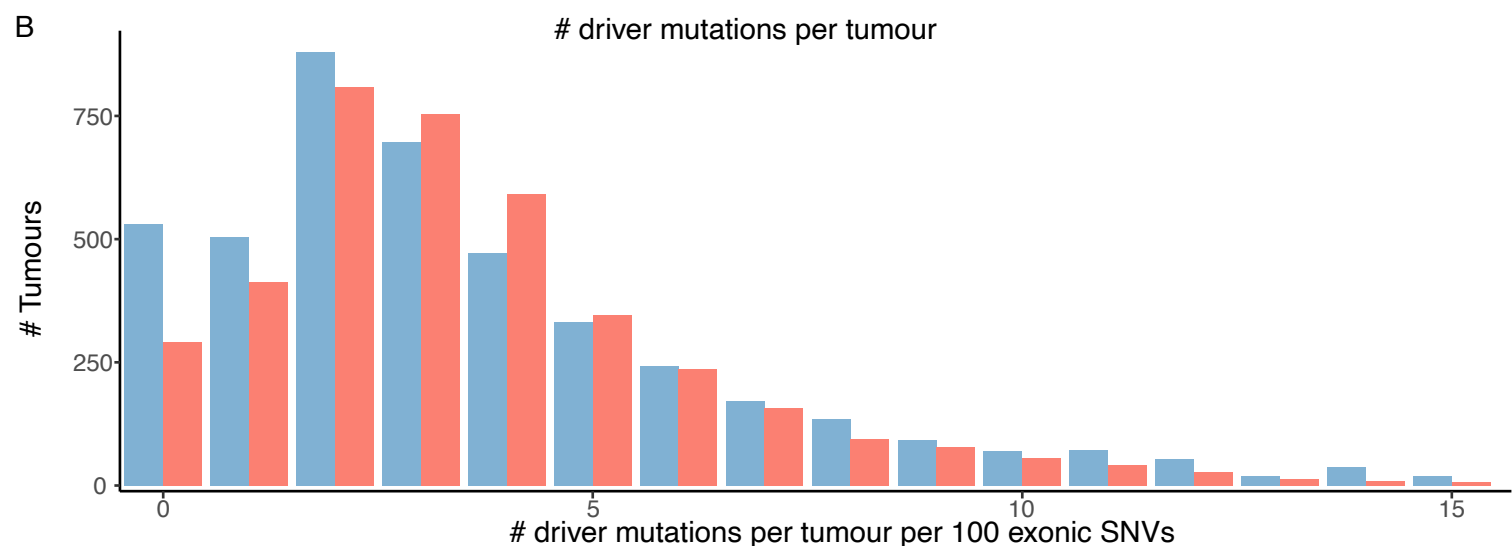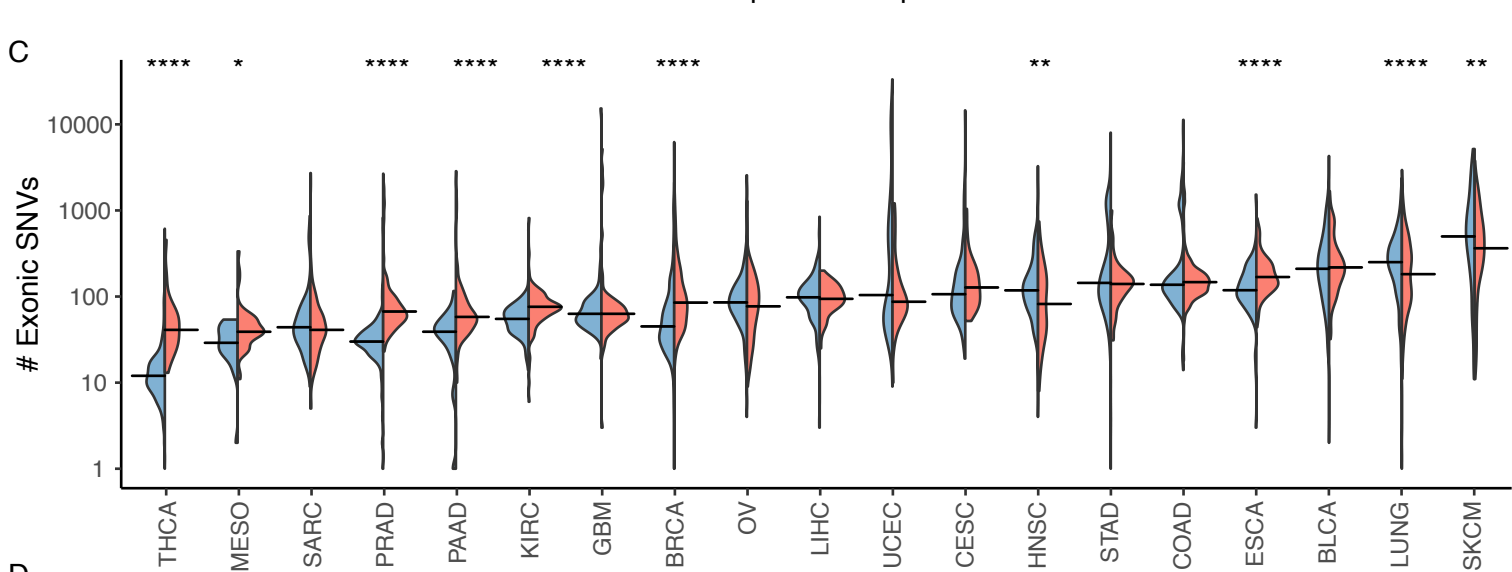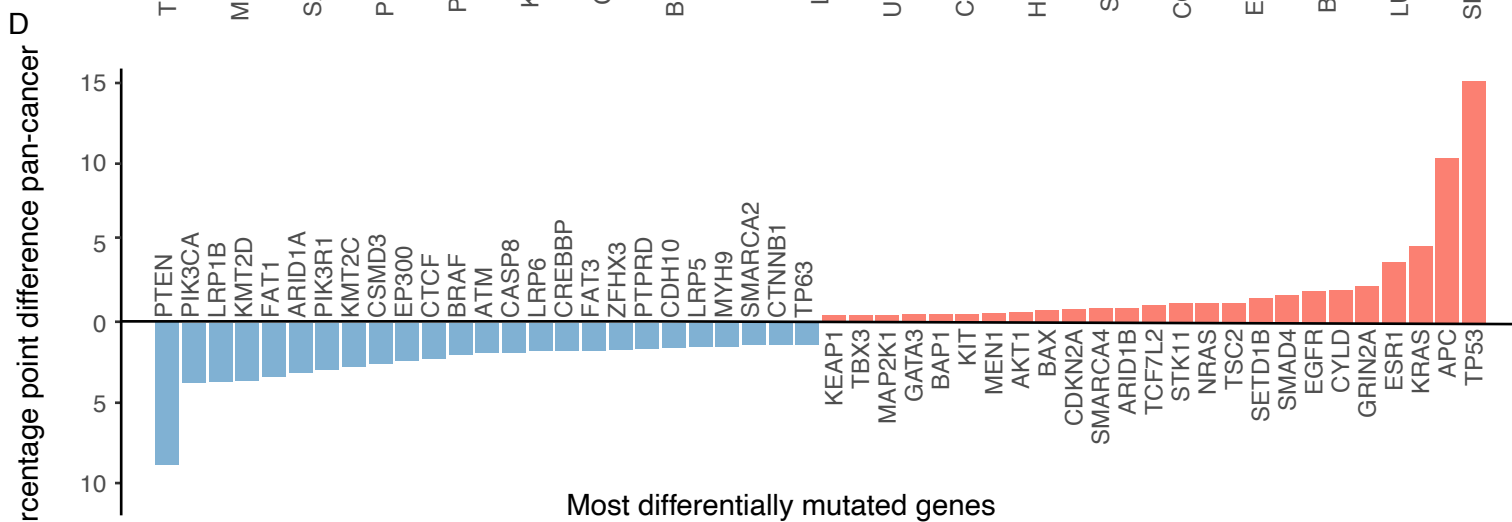

Supplement: Supplementary file 5 [file supplementary]
